# Supplementary material for: Synergistic effects of Fe and Ag doping on the structural and optical properties of a TiO2 thin film: a dual function platform for hydrogen generation and dye degradation
Source: Royal Society of Chemistry journal article supplement (doi:10.1039/d4dt01803f), 2024-01-01
Supplement: d4dt01803f1.pdf [file d4dt01803f1.pdf]

## Supplementary Information

# Synergistic Effects of Fe and Ag Doping on The Structural and Optical Properties of TiO<sub>2</sub> Thin Film: Dual Functions Platform for Hydrogen Generation and Dye Degradation

Akhil Pradiprao Khedulkar<sup>1</sup>, S. Bolloju<sup>2</sup>, L. K. Pradhan<sup>3</sup>, Bidhan Pandit<sup>4</sup>, Umesh T. Nakate<sup>5</sup>,  
S. S. Mahato<sup>6\*</sup>, S. Mahata<sup>6\*\*</sup>

<sup>1</sup>*Department of Electrophysics, National Yang Ming Chiao Tung University, 1001 University Road, Hsinchu 300093, Taiwan*

<sup>2</sup>*WMG, University of Warwick, Coventry CV4 7AL, United Kingdom*

<sup>3</sup>*Department of Electronics and Communication Engineering, National Institute of Science and Technology, Berhampur, India, 760001*

<sup>4</sup>*Department of Materials, Imperial College London, London SW7 2AZ, United Kingdom*

<sup>5</sup>*Department of Polymer-Nano Science and Technology, Jeonbuk National University, 567 Baekje-daero, Deokjin-gu, Jeonju-si, Jeollabuk-do, Republic of Korea*

<sup>6</sup>*Department of Chemistry, National Institute of Science and Technology, Berhampur, India, 760001*

**\*\*Corresponding Authors:** [shrabani.mahata@gmail.com](mailto:shrabani.mahata@gmail.com) (Shrabani Mahata),

**\*Co-Corresponding Authors:** [satyasopan@gmail.com](mailto:satyasopan@gmail.com) (Satya Sopan Mahato)

## **S1: Characterization Techniques**

To examine the structural properties and the crystallite size of the developed thin films, diffraction peaks analysis performed with Cu- K $\alpha$  radiation ( $\lambda = 1.54\text{\AA}$ ) using X-ray powder diffraction from PAN analytical. A scan rate of  $1 \text{ min}^{-1}$  was applied to record a pattern in  $2\theta$  range of  $10\text{-}60^\circ$ . Optical characteristics of developed thin films were examined by using Shimadzu 1800, Japan UV-Vis spectrophotometer. Morphological properties study of the developed thin films was explored by scanning electroscopic microscope (SEM) (Supra 40) from Carl-Zeiss, Germany. FT-IR spectra were recorded by using Perkin Elmer PE- 1600 model spectrometer using KBr pellet with the resolution of  $4\text{cm}^{-1}$ .

## **S2: Calculations for Structural Parameters**

The average crystal size and Microstrain of the TiO<sub>2</sub> nanostructures were determined using XRD data. The Debye-Scherrer formula was applied to calculate the average crystallite size, as shown in Eqn 2.

$$D=k\lambda/\beta\text{Cos}\theta \quad (2)$$

where  $k$  = crystal shape constant having value 0.94,  $\lambda$  = X-ray wavelength,  $\beta$  = full-width at half maxima and  $\theta$  = Bragg's diffraction angle. The Microstrain is evaluated by using Eqn. 3

$$\varepsilon=\beta/4\tan\theta \quad (3)$$

The dislocation density is also calculated by using the following Eqn. 4

$$\delta=1/D^2 \quad (4)$$

### S3: Calculations for Bandgap using Brus formula

The average particle size (R) of TiO<sub>2</sub> nanoparticles was estimated using Brus Equation as follows:

$$E_g = E + \frac{h^2}{8R^2} \left[ \frac{1}{(m_e^*)} + \frac{1}{(m_h^*)} \right] - \frac{1.8e^2}{\epsilon R} \quad (5)$$

Where,  $E_g$  = band gap of synthesized nanoparticles,  $E$  = bulk band gap of TiO<sub>2</sub> (3.2 eV),  $R$ =radius of particle,  $m_e^*$ =effective mass of the electron,  $m_h^*$ =effective mass of hole (for TiO<sub>2</sub>, it is 0.8  $m_0$ ),  $\epsilon$  = dielectric constant of the material,  $h$  is Planck's constant. The fundamental absorption due to electronic excitation from the valance band (VB) to the conduction band is decidedly useful to determine the nature and value of the optical band gap. The band gap was calculated using the formula

$$E_g = 1240/\lambda \quad (6)$$

where,  $E_g$  = band gap of TiO<sub>2</sub> and  $\lambda$  = wavelength of absorption maxima for TiO<sub>2</sub>.

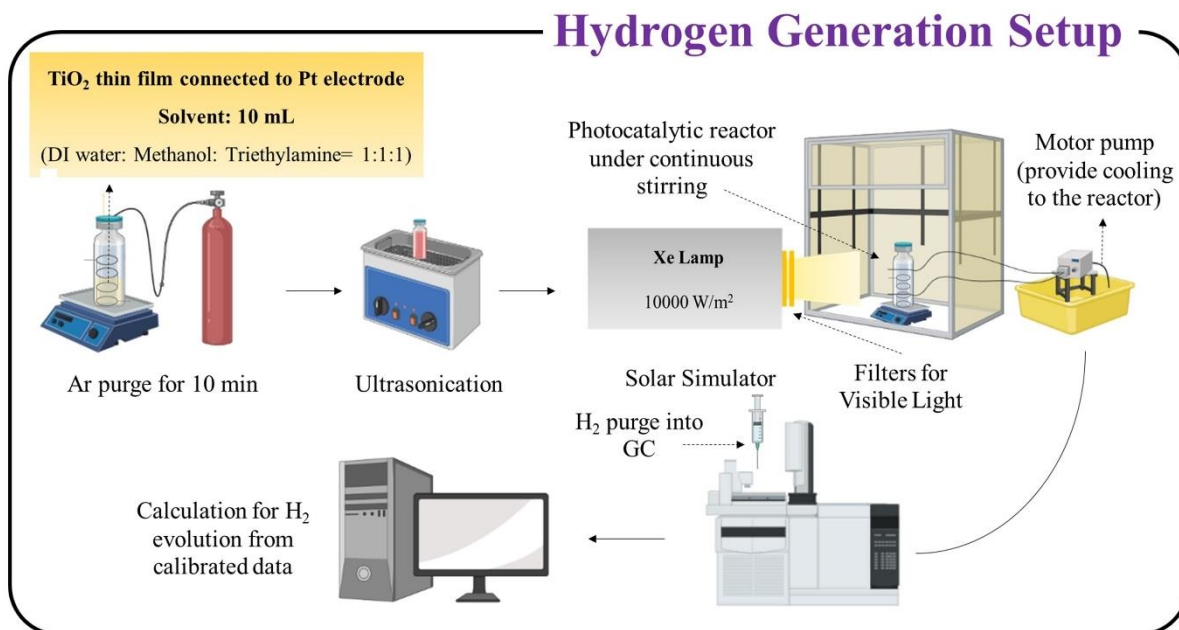

**Fig. S1** shows the photocatalytic Hydrogen generation setup

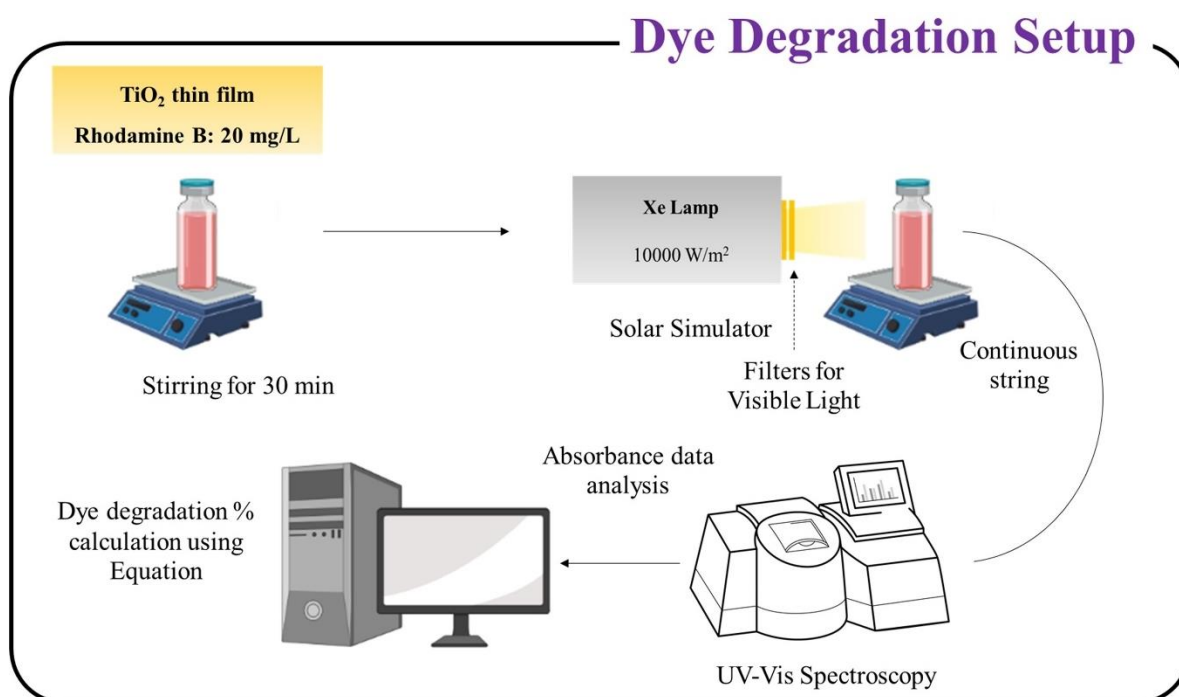

**Fig. S2** shows the photocatalytic dye degradation efficiency setup

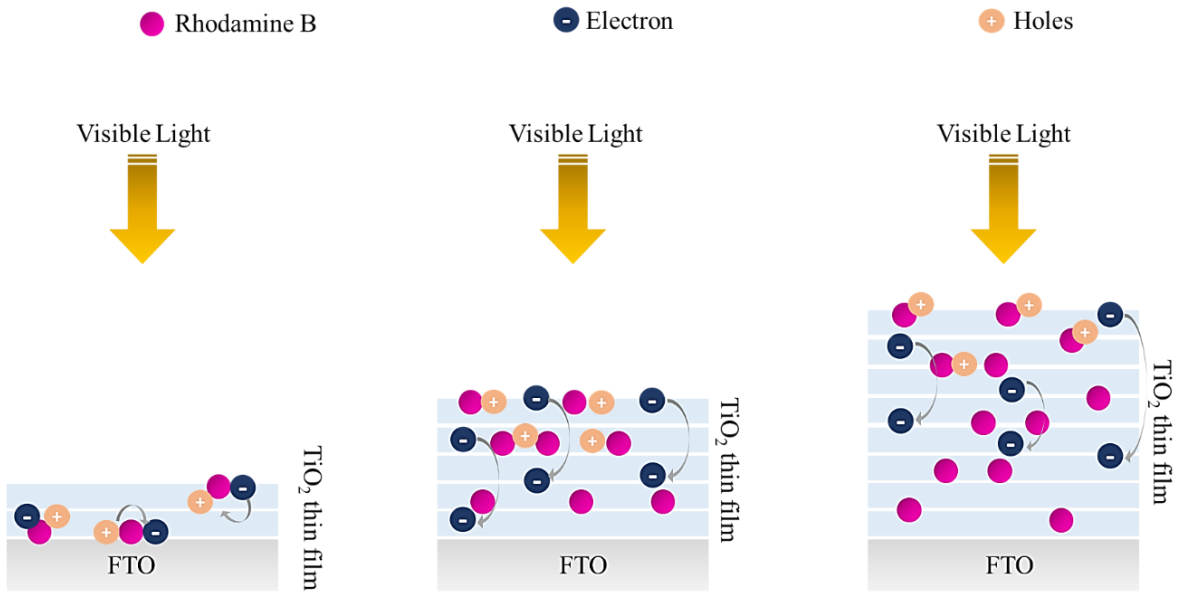

Fig. S3 shows the mechanism of TiO<sub>2</sub> thin film dye degradation for different layers.

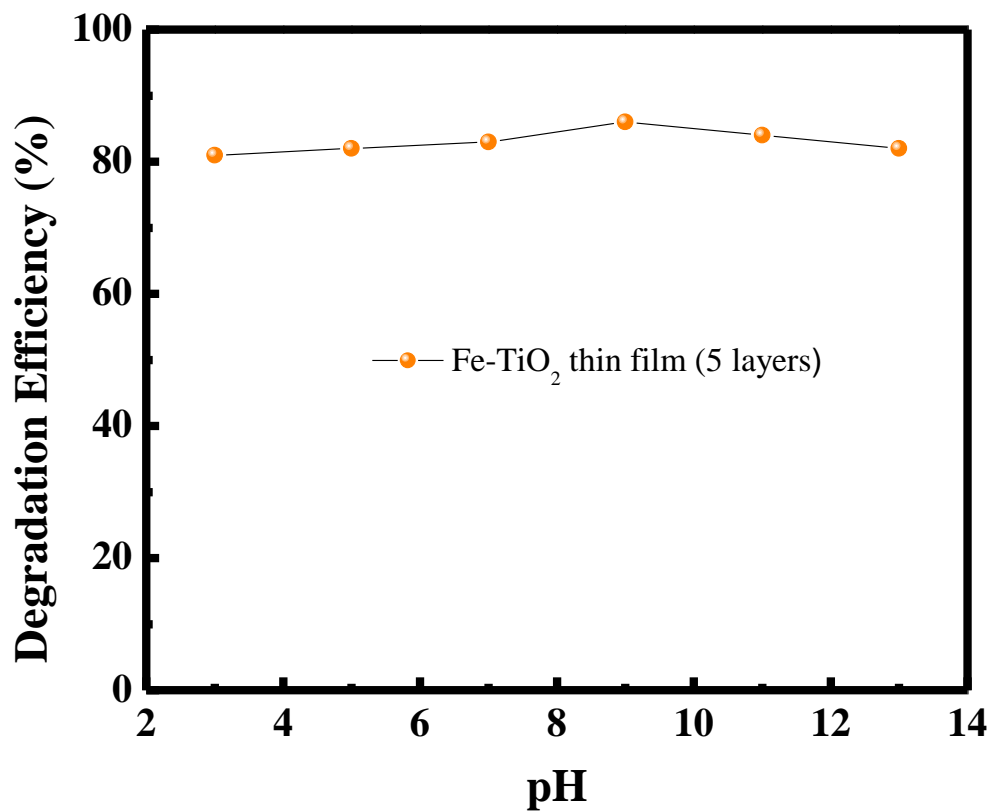

Fig. S4 shows the visible light driven Rhodamine 6G dye degradation using TiO<sub>2</sub>-Fe<sub>2</sub>O<sub>3</sub> photocatalyst in different pH conditions.

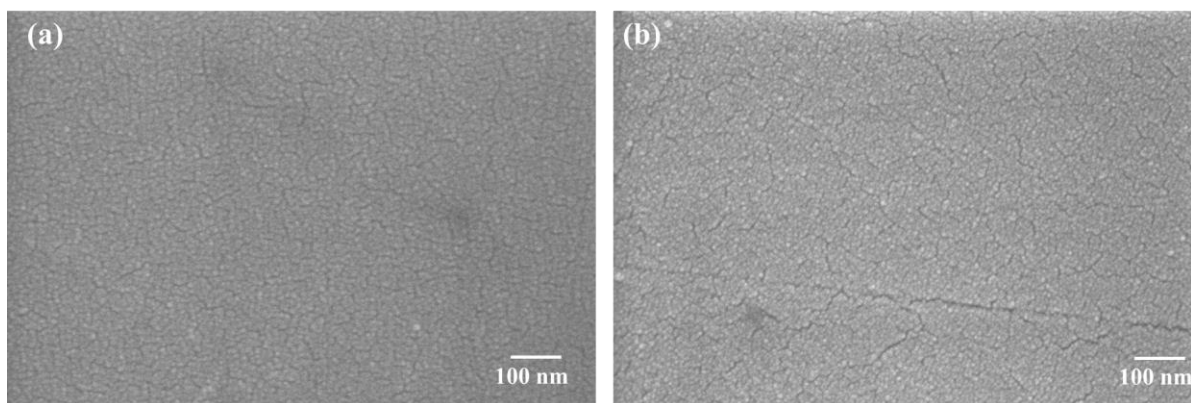

**Fig. S5** shows the FESEM surface images of Ag-TiO<sub>2</sub> (a) and Fe-TiO<sub>2</sub> (b) thin film photocatalyst in 100 nm scale.

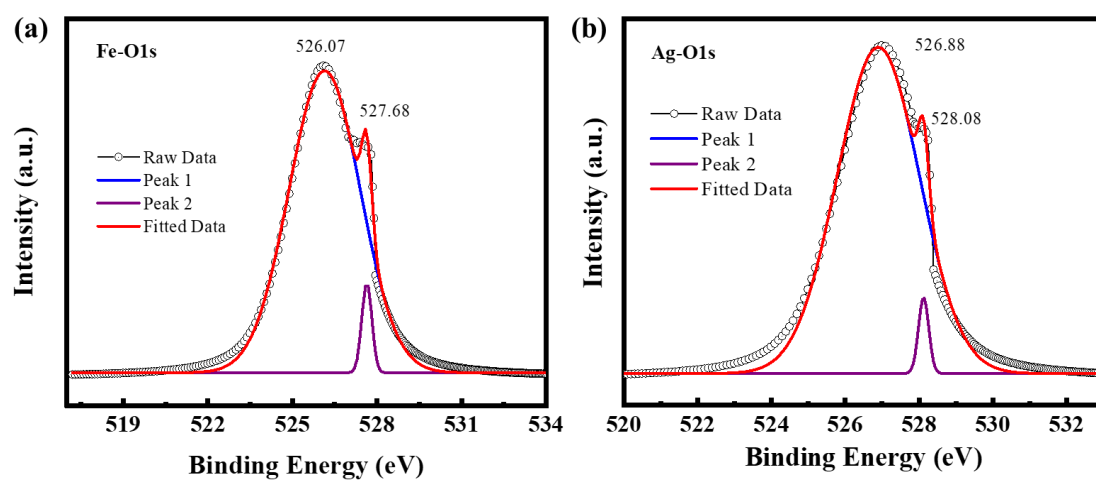

**Fig. S6** shows the XPS spectrum of O1s for Fe-TiO<sub>2</sub> (a) and Ag-TiO<sub>2</sub> (b)

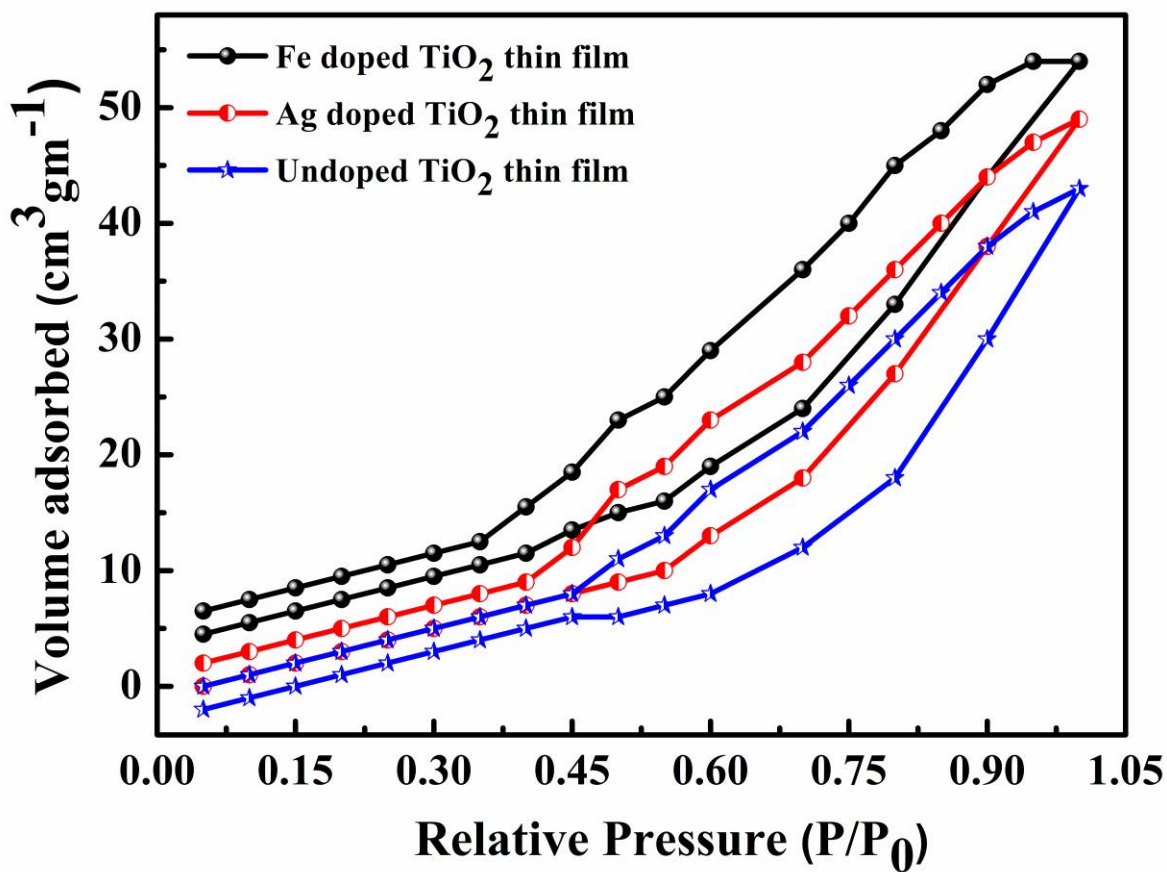

Fig. S7 shows the BET surface area for all the developed thin film samples.

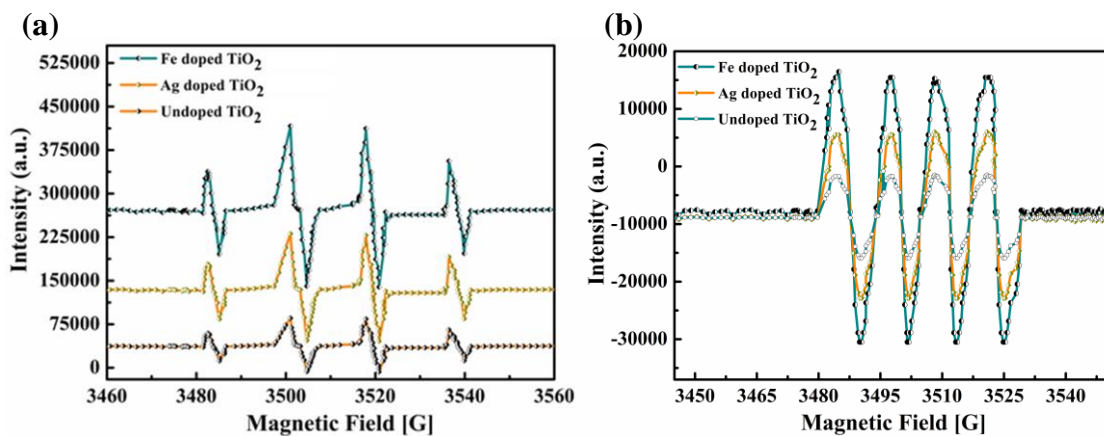

Fig. S8 shows the ESR and EPR data for all the developed thin film samples.

Table S1

| Sample ID | Sample Details        | Injection Volume( $\mu$ L) | Degradation time | Mean area | TOC (ppm) |
|-----------|-----------------------|----------------------------|------------------|-----------|-----------|
| Sample 1  | Original Dye          | 50                         | 0 mins           | 55.78     | 27.45     |
| Sample 2  | Dye after 45 mins deg | 50                         | 45 mins          | 51.32     | 24.73     |
| Sample 3  | Dye after 75 mins deg | 50                         | 75 mins          | 46.34     | 21.28     |

**S9: Sample 1:**

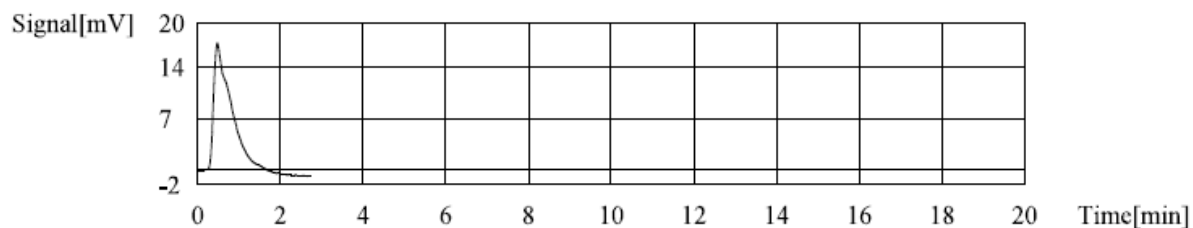

**S10: Sample 2:**

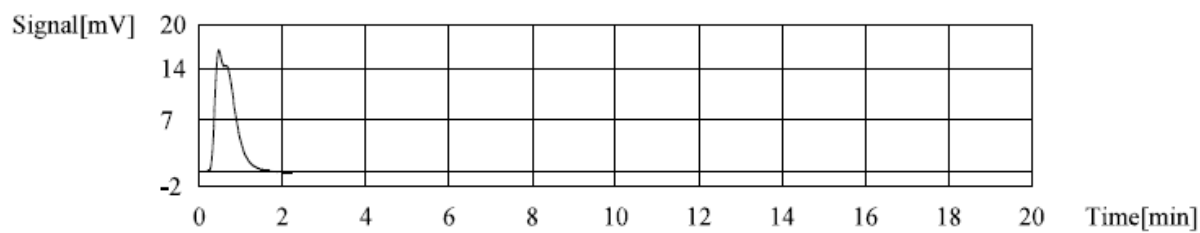

**S 11: Sample 3:**

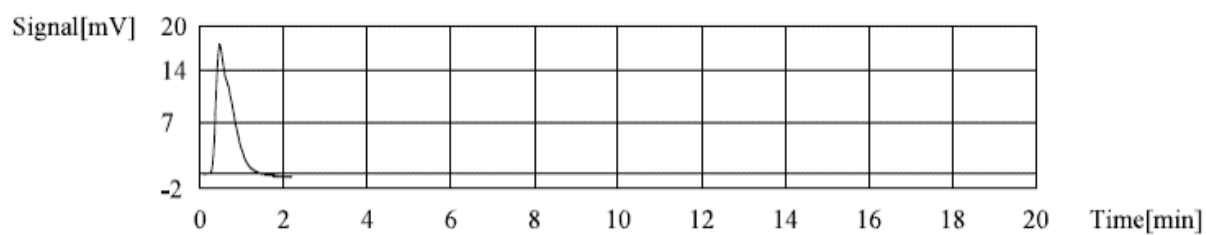



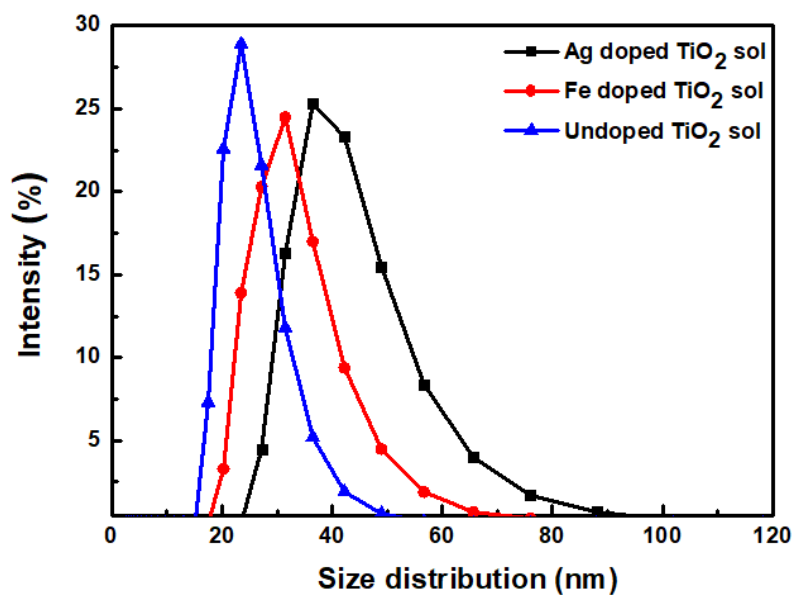

**Fig. S12** DLS study of Ag-TiO<sub>2</sub>, Ag-TiO<sub>2</sub>, Undoped TiO<sub>2</sub> sol

**Table S2** shows a comparative photocatalytic dye degradation efficiency of the present work on TiO<sub>2</sub>-Fe<sub>2</sub>O<sub>3</sub> thin film with other reported literatures.

| Sl. No.   | Photocatalyst                                      | Photocatalyst Amt. of (mg) | Conc.(mgL <sup>-1</sup> ) of dye | Time (min) | Dye degradation Efficiency (%) | Ref.                 |
|-----------|----------------------------------------------------|----------------------------|----------------------------------|------------|--------------------------------|----------------------|
| 1.        | TiO <sub>2</sub> -Fe <sub>2</sub> O <sub>3</sub>   | 200                        | 25- Methylene blue               | 300        | 88                             | <sup>1</sup>         |
| 2.        | TiO <sub>2</sub> -Fe <sub>2</sub> O <sub>3</sub>   | 50                         | 20- Orange II                    | 180        | 55                             | <sup>2</sup>         |
| 3.        | TiO <sub>2</sub> -Fe <sub>2</sub> O <sub>3</sub>   | 5                          | 10- Rhodamine B                  | 300        | 60                             | <sup>3</sup>         |
| 4.        | TiO <sub>2</sub> -Fe <sub>2</sub> O <sub>3</sub>   | 200                        | 10 and Phenol                    | 60         | 17                             | <sup>4</sup>         |
| 5.        | TiO <sub>2</sub> -Fe <sub>2</sub> O <sub>3</sub>   | 30                         | 10- Methylene Blue               | 150        | 70                             | <sup>5</sup>         |
| <b>6.</b> | <b>TiO<sub>2</sub>-Fe<sub>2</sub>O<sub>3</sub></b> | <b>50</b>                  | <b>10- Rhodamine B</b>           | <b>145</b> | <b>85</b>                      | <b>Present study</b> |

## References

- 1 R. Li, Y. Jia, N. Bu, J. Wu and Q. Zhen, *Journal of Alloys and Compounds*, 2015, **643**, 88–93.
- 2 L. Peng, T. Xie, Y. Lu, H. Fan and D. Wang, *Physical Chemistry Chemical Physics*, 2010, **12**, 8033–8041.
- 3 Y. Xia and L. Yin, *Physical Chemistry Chemical Physics*, 2013, **15**, 18627–18634.
- 4 M. Xie, Q. Meng, P. Luan, Y. Feng and L. Jing, *RSC Adv.*, 2014, **4**, 52053–52059.
- 5 W.-K. Jo and N. C. Sagaya Selvam, *Dalton Transactions*, 2015, **44**, 16024–16035.
